# Supplementary material
Source: publisher figshare collection journal article supplement (https://gsajournals.figshare.com/ndownloader/files/28175628)
Supplement: Supplementary file 1 [file 28175628]

ID	Haplo1	Haplo2	MHC_diplo	MasterPlate	Well	DQA1_status
2874	B	B	B:B	NA	NA	NA
2923	E	E	E:E	NA	NA	NA
4051	C	E	C:E	NA	NA	NA
4131	E	F	E:F	NA	NA	NA
4161	B	H	B:H	NA	NA	NA
4166	A	B	A:B	NA	NA	NA
4318	C	E	C:E	NA	NA	NA
4327	G	C	G:C	NA	NA	NA
4361	A	A	A:A	NA	NA	NA
4399	G	E	G:E	NA	NA	NA
4549	E	F	E:F	NA	NA	NA
5467	G	B	G:B	NA	NA	NA
5473	F	H	F:H	NA	NA	NA
5557	B	E	B:E	NA	NA	NA
6459	G	C	G:C	NA	NA	NA
6688	B	B	B:B	NA	NA	NA
6726	A	A	A:A	NA	NA	NA
6844	D	H	D:H	NA	NA	NA
6889	D	H	D:H	NA	NA	NA
6908	D	F	D:F	NA	NA	NA
6986	F	H	F:H	NA	NA	NA
7695	A	G	A:G	NA	NA	NA
8787	A	A	A:A	NA	NA	NA
